# Supplementary material for: Commentary: Cost-Effectiveness Analysis of Rivaroxaban Plus Aspirin Compared With Aspirin Alone in Patients With Coronary and Peripheral Artery Diseases in Italy
Source: PubMed Central journal article supplement (PMC9260166; doi:10.3389/fcvm.2022.916705), 2022-06-23
Supplement: Table_1.pdf [file Table_1.pdf]

## The Quality of Health Economic Studies (QHES) instrument

Taken from: Ofman JJ, Sullivan SD, Neumann PJ, Chiou CF, Henning JM, Wade SW, Hay JW. Examining the value and quality of health economic analyses: implications of utilizing the QHES. *Journal of Managed Care and Pharmacy* 2003; 9(1):53-61.

| No  | Questions                                                                                                                                                                                         | Points     | Yes | No |
|-----|---------------------------------------------------------------------------------------------------------------------------------------------------------------------------------------------------|------------|-----|----|
| 1.  | Was the study objective presented in a clear, specific, and measurable manner?                                                                                                                    | 7          | ✓   |    |
| 2.  | Were the perspective of the analysis (societal, third-party payer, etc.) and reasons for its selection stated?                                                                                    | 4          | ✓   |    |
| 3.  | Were variable estimates used in the analysis from the best available source (i.e., randomized control trial - best, expert opinion - worst)?                                                      | 8          | ✓   |    |
| 4.  | If estimates came from a subgroup analysis, were the groups pre-specified at the beginning of the study?                                                                                          | 1          | ✓   |    |
| 5.  | Was uncertainty handled by (1) statistical analysis to address random events, (2) sensitivity analysis to cover a range of assumptions?                                                           | 9          | ✓   |    |
| 6.  | Was incremental analysis performed between alternatives for resources and costs?                                                                                                                  | 6          |     | ✓  |
| 7.  | Was the methodology for data abstraction (including the value of health states and other benefits) stated?                                                                                        | 5          | ✓   |    |
| 8.  | Did the analytic horizon allow time for all relevant and important outcomes? Were benefits and costs that went beyond 1 year discounted (3% to 5%) and justification given for the discount rate? | 7          | ✓   |    |
| 9.  | Was the measurement of costs appropriate and the methodology for the estimation of quantities and unit costs clearly described?                                                                   | 8          | ✓   |    |
| 10. | Were the primary outcome measure(s) for the economic evaluation clearly stated and did they include the major short-term, long-term, and negative outcomes?                                       | 6          | ✓   |    |
| 11. | Were the health outcomes measures/scales valid and reliable? If previously tested valid and reliable measures were not available, was justification given for the measures/scales used?           | 7          | ✓   |    |
| 12. | Were the economic model (including structure), study methods and analysis, and the components of the numerator and denominator displayed in a clear, transparent manner?                          | 8          | ✓   |    |
| 13. | Were the choice of economic model, main assumptions, and limitations of the study stated and justified?                                                                                           | 7          | ✓   |    |
| 14. | Did the author(s) explicitly discuss direction and magnitude of potential biases?                                                                                                                 | 6          |     | ✓  |
| 15. | Were the conclusions/recommendations of the study justified and based on the study results?                                                                                                       | 8          | ✓   |    |
| 16. | Was there a statement disclosing the source of funding for the study?                                                                                                                             | 3          | ✓   |    |
|     | <b>TOTAL POINTS</b>                                                                                                                                                                               | <b>100</b> | 88  |    |
